# Supplementary material
Source: PubMed Central journal article supplement (PMC123221)

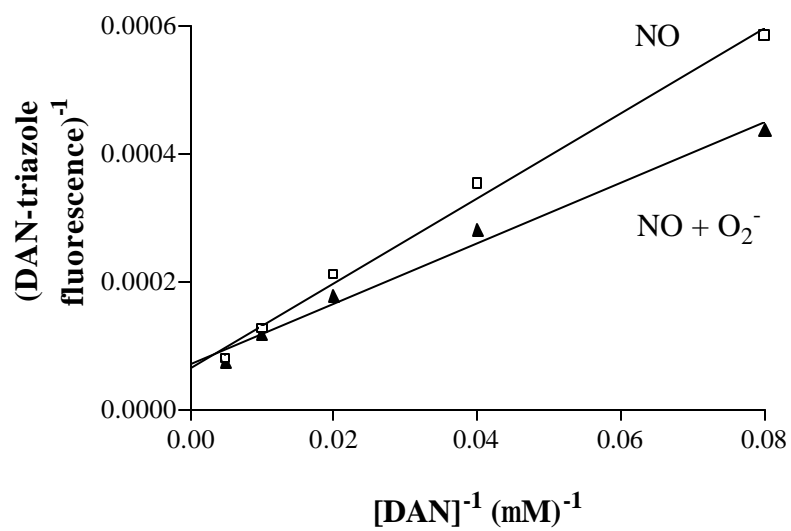

Supplement: pnas_152157599_4.pdf [file pnas_152157599_4.pdf]

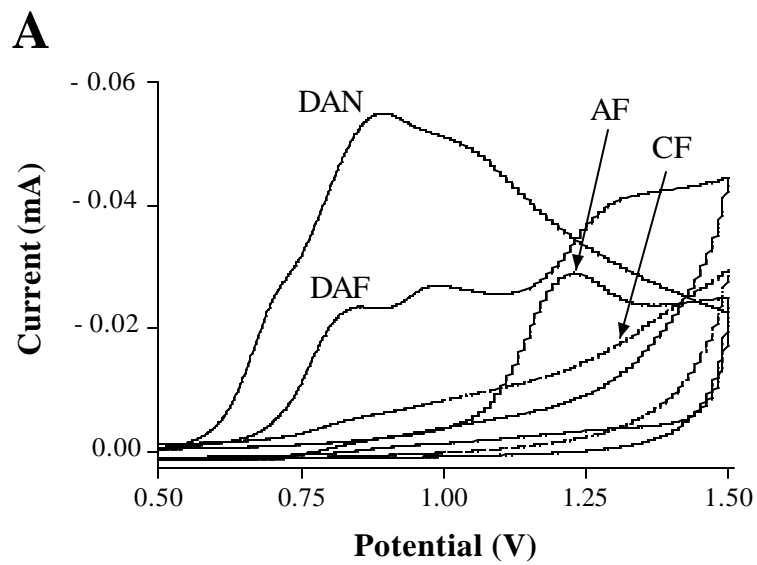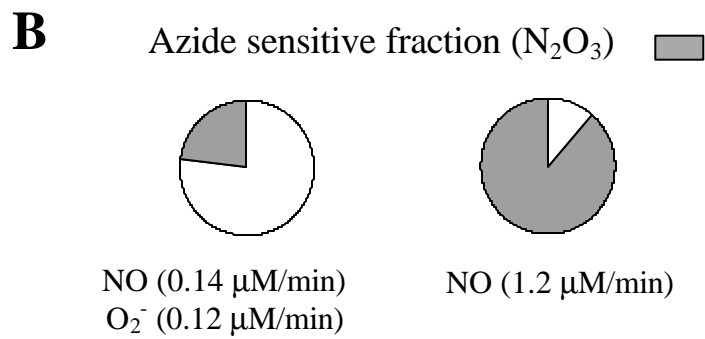

Supplement: pnas_152157599_5.pdf [file pnas_152157599_5.pdf]

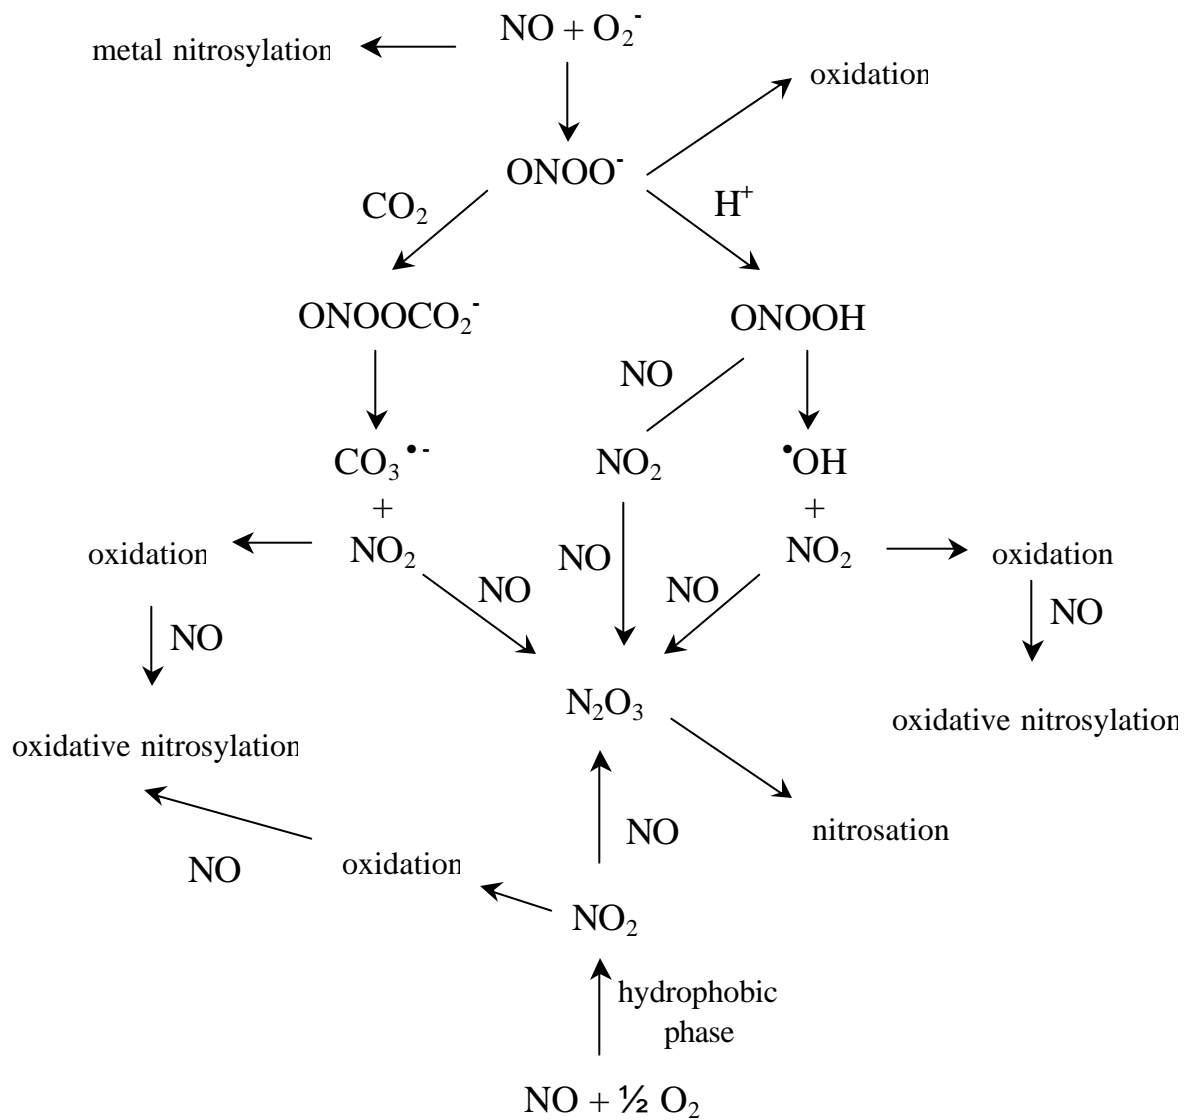

Supplement: pnas_152157599_6.pdf [file pnas_152157599_6.pdf]
